# Supplementary material for: Exosomal proteins as potential diagnostic markers in advanced non-small cell lung carcinoma
Source: PubMed Central journal article supplement — J Extracell Vesicles. 2015 Mar 2;4:10.3402/jev.v4.26659. doi: 10.3402/jev.v4.26659 (PMC4348413; doi:10.3402/jev.v4.26659), 2015-03-02
Supplement: JEV-4-26659-s001.pdf [file JEV-4-26659-s001.pdf]

**Figure S1A**

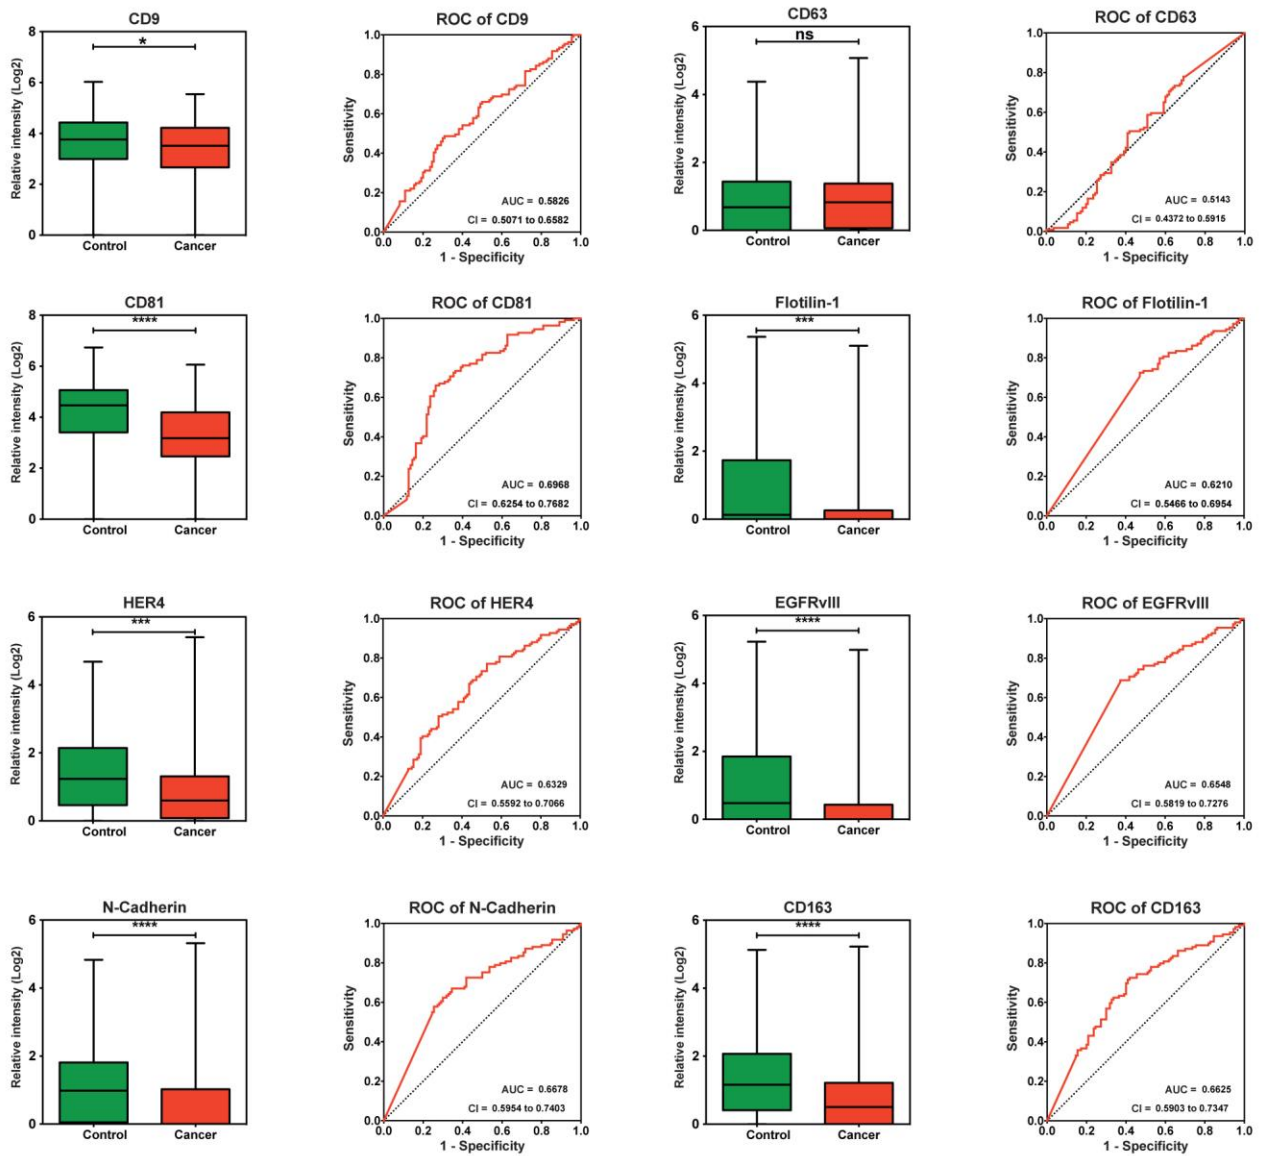

**Figure S1A. ROC-curves and Box-plots for co-varying markers.** Univariate analysis of log<sub>2</sub> transformed non-normalised marker data with illustration of ROC-curves derived for each individual marker. Dotted lines indicate the line of identity. AUC= Area Under Curve; CI=Confidence Interval; \* = p < 0.05; \*\* = p < 0.01; \*\*\* = p < 0.001; \*\*\*\* = p < 0.0001; ns= not significant.

**Figure S1B**

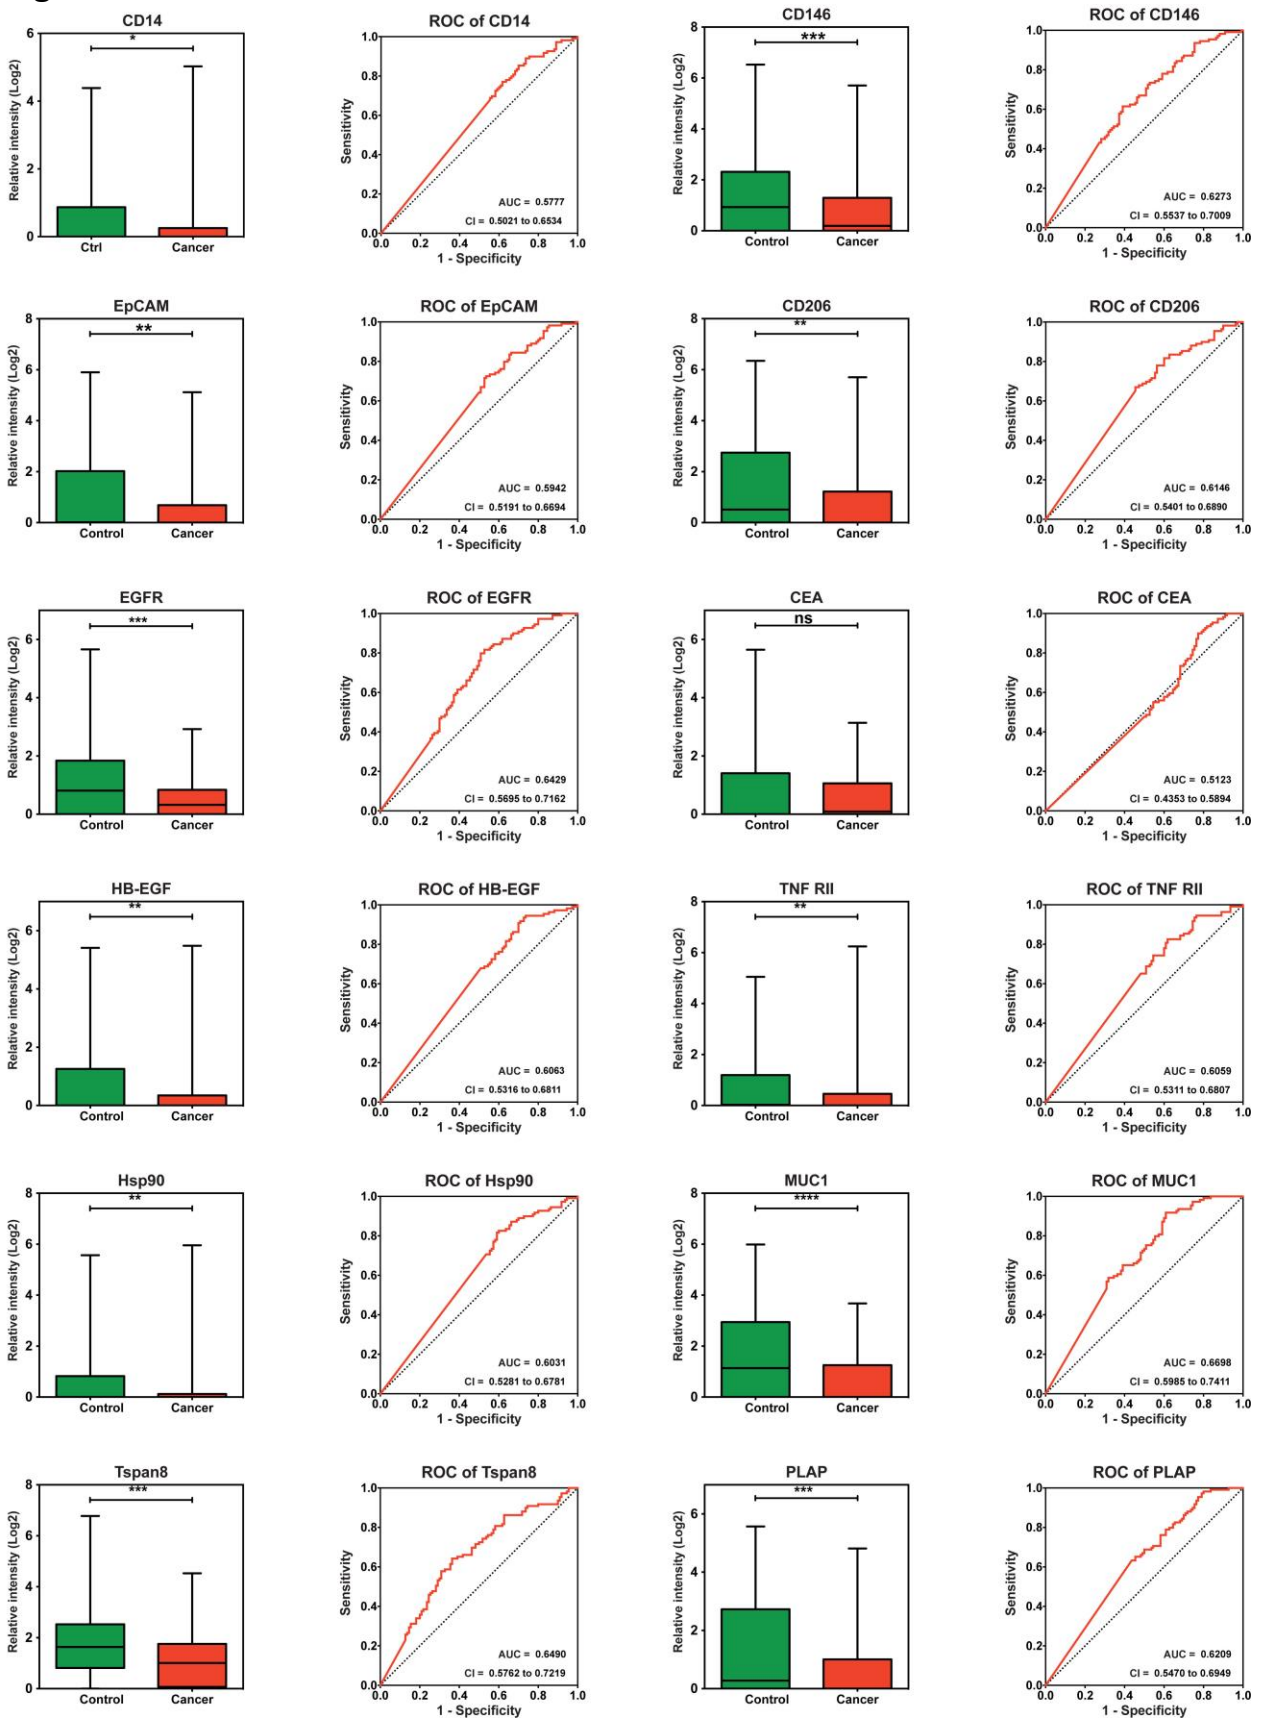

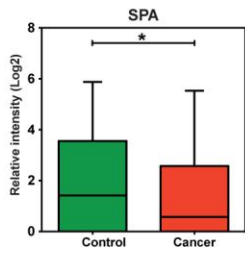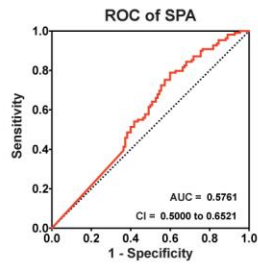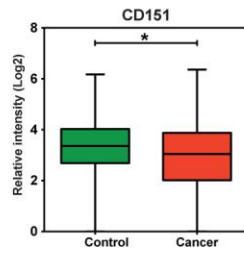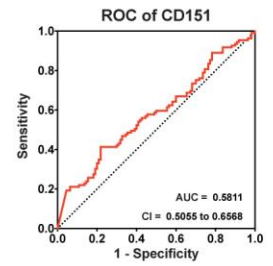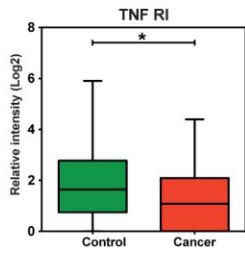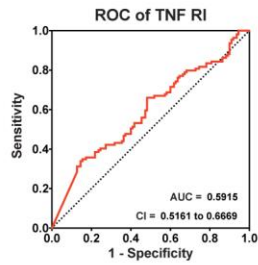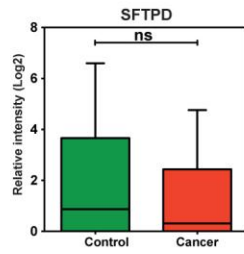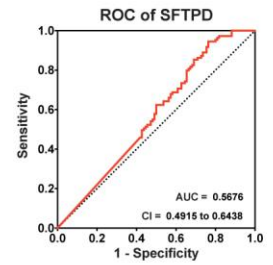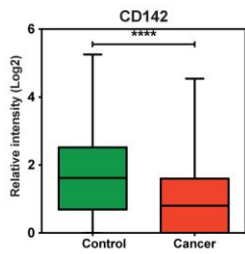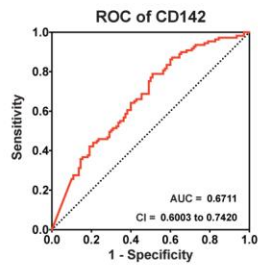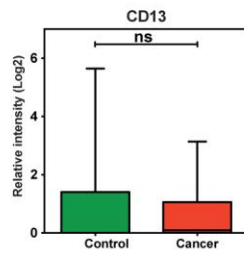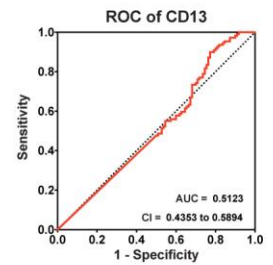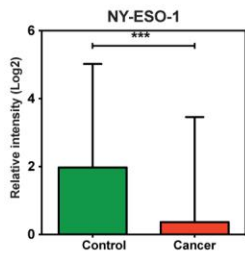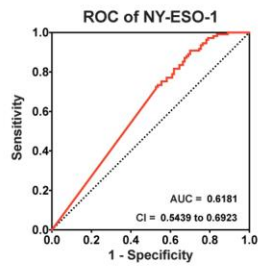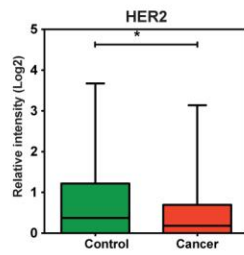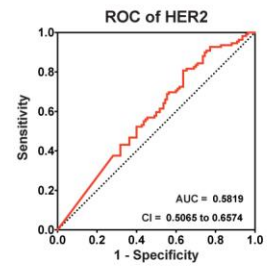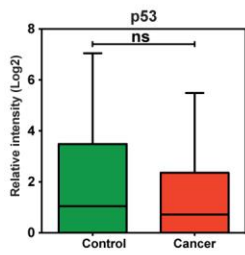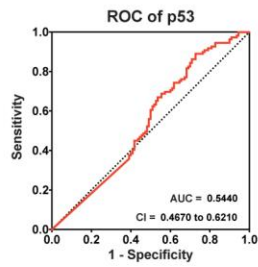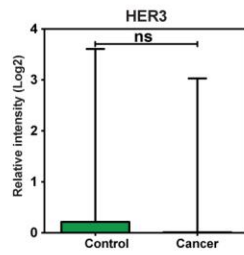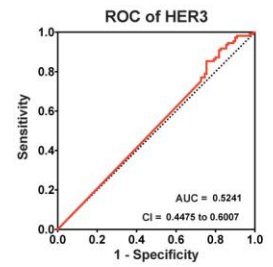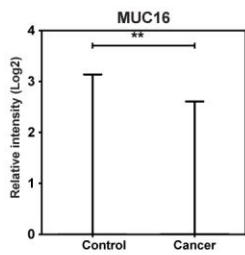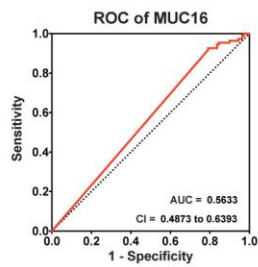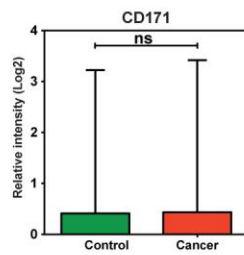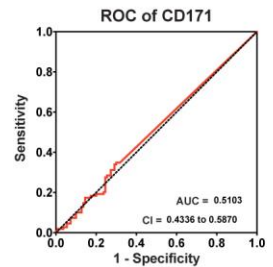

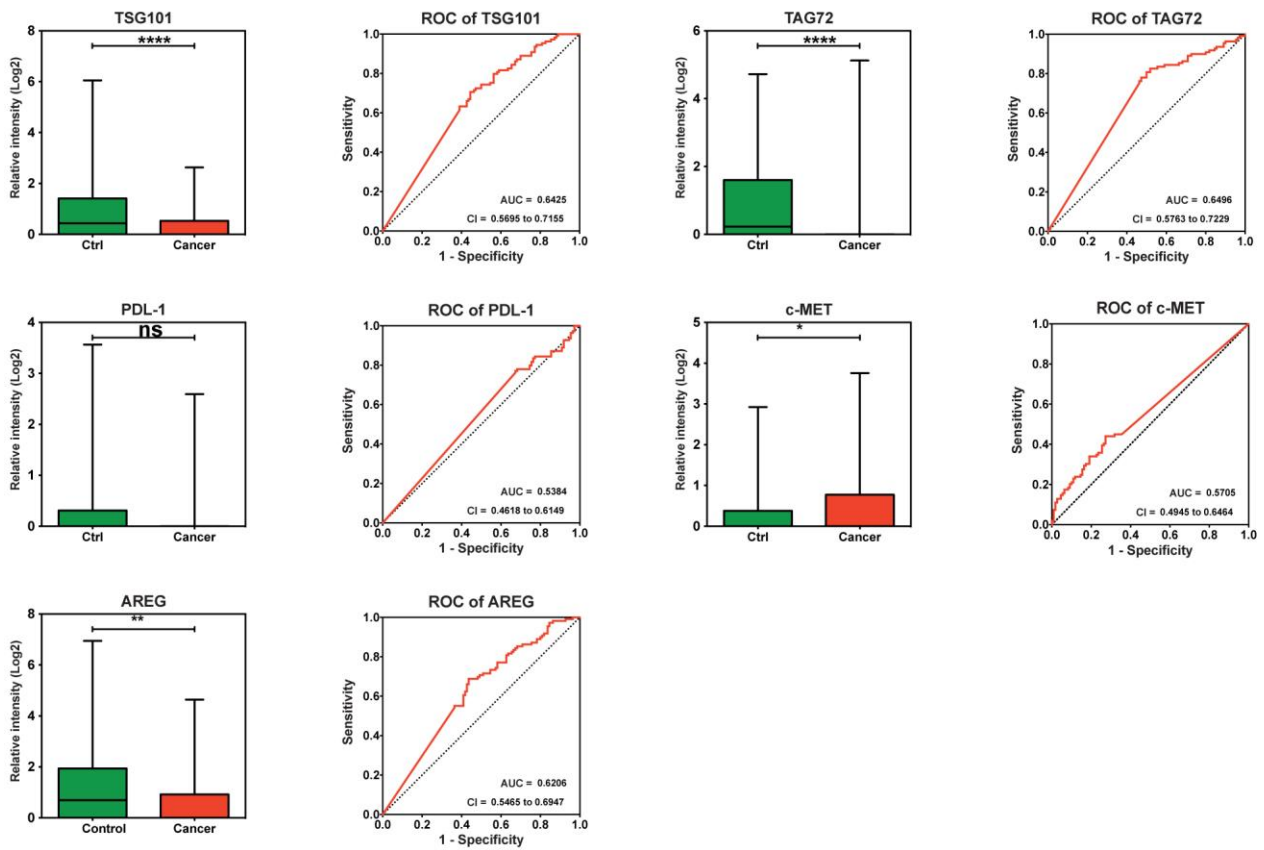

**Figure S1B. ROC-curves and Box-plots for additional markers.** Univariate analysis of log2 transformed non-normalised marker data with illustration of ROC-curves derived for each individual marker. Dotted lines indicate the line of identity. AUC= Area Under Curve; CI=Confidence Interval; \* =  $p < 0.05$ ; \*\* =  $p < 0.01$ ; \*\*\* =  $p < 0.001$ ; \*\*\*\* =  $p < 0.0001$ ; ns= not significant.
